# Supplementary material
Source: PubMed Central journal article supplement (PMC4789890)
Supplement: pald898288.ww1_default.pdf [file pald898288.ww1_default.pdf]

## **Web Appendix A: Methods for handling missing data and results of sensitivity analyses**

Of the 706 infants in the study, 681 (96.5%) attended their one year medical review and 666 (94.3%) had skin prick test results. Consequently, there was a small amount of missing data for outcome variables assessed at one year. In order to minimise bias due to missing data in the estimation of treatment effects, multiple imputation was used to create 50 complete datasets for analysis. Imputation was performed sequentially (baseline variables, post randomisation variables, outcomes) using the parametric regression method for continuous and count variables and the logistic regression method for binary and ordinal variables (Rubin, 1987). For each outcome, all variables pre-specified as predictors in the analysis model (i.e. treatment group, centre, parity, infant sex and maternal history of allergic disease) were included in the imputation model. Additional baseline variables and post randomisation variables potentially predictive of the outcomes were also added to the imputation models. Each imputation model was examined based on the estimated regression coefficients and the imputed values generated. Where appropriate, variables were omitted from the imputation models to avoid multicollinearity problems and to improve the overall quality of the model. All data were imputed using the mi procedure in SAS version 9.2. Following separate analyses of the 50 imputed datasets using standard methods for complete data, single estimates with valid standard errors were computed using the mi\_analyze procedure in SAS version 9.2 according to Rubin's rules (Rubin, 1987).

Tables A1, A2 and A3 summarise the amount of missing data and the type of imputation model used for key baseline, key post randomisation and outcome variables respectively.

**Table A1: Amount of missing data and imputation approach for key baseline variables**

| <i>Baseline variable</i>             | <i>Variable type</i> | <i>N (%) missing</i> | <i>Imputation model</i> <sup>a</sup> |
|--------------------------------------|----------------------|----------------------|--------------------------------------|
| Treatment group                      | Binary               | 0 (0.0)              | -                                    |
| Parity zero                          | Binary               | 0 (0.0)              | -                                    |
| Infant sex male                      | Binary               | 0 (0.0)              | -                                    |
| Enrolment centre                     | Binary               | 0 (0.0)              | -                                    |
| Mother's age at trial entry (years)  | Continuous           | 0 (0.0)              | -                                    |
| Mother Caucasian                     | Binary               | 0 (0.0)              | -                                    |
| Mother completed secondary education | Binary               | 0 (0.0)              | -                                    |
| Mother employed                      | Binary               | 0 (0.0)              | -                                    |
| Maternal smoking during pregnancy    | Binary               | 0 (0.0)              | -                                    |
| Maternal smoking prior to pregnancy  | Binary               | 0 (0.0)              | -                                    |
| Maternal history of allergic disease | Binary               | 0 (0.0)              | -                                    |
| Paternal history of allergic disease | Binary               | 17 (2.4)             | Logistic regression                  |

<sup>a</sup> *Missing data were imputed using other key baseline variables.*

**Table A2: Amount of missing data and imputation approach for key post randomisation variables**

| <i>Post randomisation variable</i>                   | <i>Variable type</i> | <i>N (%) missing</i> | <i>Imputation model</i> <sup>a</sup> |
|------------------------------------------------------|----------------------|----------------------|--------------------------------------|
| Infant born by caesarean delivery                    | Binary               | 0 (0.0)              | -                                    |
| Gestational age (weeks)                              | Continuous           | 0 (0.0)              | -                                    |
| Infant weight at birth (kg)                          | Continuous           | 0 (0.0)              | -                                    |
| Infant recumbent length at birth (cm)                | Continuous           | 1 (0.1)              | Linear regression                    |
| Infant head circumference at birth (cm)              | Continuous           | 3 (0.4)              | Linear regression                    |
| Other children in home at 6 months                   | Binary               | 11 (1.6)             | Logistic regression                  |
| Infant breast fed in first 6 months                  | Binary               | 11 (1.6)             | Logistic regression                  |
| Avoided foods during breastfeeding in first 6 months | Binary               | 11 (1.6)             | Logistic regression                  |
| Infant fed formula in first 6 months                 | Binary               | 11 (1.6)             | Logistic regression                  |
| Fish introduced to infant                            | Binary               | 9 (1.3)              | Logistic regression                  |
| Nuts introduced to infant                            | Binary               | 12 (1.7)             | Logistic regression                  |
| Egg introduced to infant                             | Binary               | 6 (0.9)              | Logistic regression                  |
| Dog or cat around home                               | Binary               | 7 (1.0)              | Logistic regression                  |
| Smoker in the house                                  | Binary               | 13 (1.8)             | Logistic regression                  |
| Free standing gas heater without chimney in home     | Binary               | 15 (2.1)             | Logistic regression                  |
| House dust mite protector or cover on mattress       | Binary               | 7 (1.0)              | Logistic regression                  |
| Regular contact with other children                  | Binary               | 6 (0.9)              | Logistic regression                  |

<sup>a</sup> *Missing data were imputed using other key post randomisation variables and key baseline variables.*

**Table A3: Amount of missing data and imputation approach for outcomes**

| <i>Outcome variable<sup>a</sup></i>                        | <i>Variable type</i> | <i>N (%) missing</i> | <i>Imputation model<sup>b</sup></i>  |
|------------------------------------------------------------|----------------------|----------------------|--------------------------------------|
| Allergic disease with sensitisation                        | Binary               | 40 (5.7)             | Logistic regression                  |
| Allergic disease without sensitisation                     | Binary               | 25 (3.5)             | Logistic regression                  |
| Sensitisation (incl. sensitisation by extract)             | Binary               | 40 (5.7)             | Logistic regression <sup>c</sup>     |
| Sensitisation without allergic disease                     | Binary               | 37 (5.2)             | Logistic regression                  |
| Eczema                                                     | Binary               | 22 (3.1)             | Logistic regression                  |
| Eczema with sensitisation                                  | Binary               | 25 (3.5)             | Logistic regression                  |
| Parent reported doctor diagnosis of eczema                 | Binary               | 13 (1.8)             | Logistic regression                  |
| Objective SCORAD <sup>d</sup>                              | Continuous           | 3 (2.8)              | Linear regression                    |
| Confirmed food allergy with sensitisation                  | Binary               | 40 (5.7)             | Logistic regression                  |
| Suspected food allergy with sensitisation                  | Binary               | 40 (5.7)             | Logistic regression                  |
| Confirmed egg allergy                                      | Binary               | 40 (5.7)             | Logistic regression                  |
| Suspected egg allergy                                      | Binary               | 40 (5.7)             | Logistic regression                  |
| Confirmed or suspected egg allergy                         | Binary               | 40 (5.7)             | Logistic regression                  |
| Frequent or persistent wheeze or asthma with sensitisation | Binary               | 20 (2.8)             | Not imputed due to rarity of outcome |
| Allergic rhinitis with sensitisation                       | Binary               | 20 (2.8)             | Not imputed due to rarity of outcome |
| Antibiotics use                                            | Binary               | 12 (1.7)             | Logistic regression                  |
| Ear antibiotics use                                        | Binary               | 14 (2.0)             | Logistic regression                  |
| Respiratory tract infections                               | Binary               | 23 (3.3)             | Logistic regression                  |
| Admission to hospital                                      | Binary               | 15 (2.1)             | Logistic regression                  |
| Number of hospitalisations                                 | Count                | 15 (2.1)             | Linear regression                    |
| Visited doctor                                             | Binary               | 8 (1.1)              | Logistic regression                  |
| Number of doctor visits                                    | Count                | 16 (2.3)             | Linear regression                    |
| Serious adverse event                                      | Binary               | 0 (0.0)              | -                                    |

<sup>a</sup> **Missing data for composite outcome measures (e.g. eczema with sensitisation) created by first imputing for individual components of outcome (e.g. sensitisation to individual extracts and eczema).**

<sup>b</sup> **Missing data were imputed using other outcomes, key post randomisation variables and key baseline variables.**

<sup>c</sup> **Sensitisation to individual extracts only imputed for egg and peanut. Sensitisation to other extracts was too rare for the imputation model to be reasonable.**

<sup>d</sup> **SCORAD only administered to the 108 infants with a current diagnosis of eczema at the one year medical review.**

As illustrated in Table A3, the percentage of missing data was 5.7% or lower for all outcomes assessed at one year. Reasons for missing outcome data included death (1 infant), study withdrawal (3), loss to follow-up (21) and refusal or inability to complete the skin prick test (15). Overall the missing at random assumption imposed by the multiple imputation approach appeared reasonable for these data.

In addition to the primary imputed analysis, sensitivity analyses were performed on the original data (i.e. complete case analysis) and on imputed data created using different seeds and using different imputation models. All approaches produced similar results. Comparisons of the primary imputed results with complete case results are provided in Tables A4, A5 and A6 below.

**Table A4: Comparison of imputed results with complete case analysis for binary outcomes**

| <i>Outcome</i> <sup>a</sup>                | <i>Adjusted relative risk from imputed model (95% CI)</i> <sup>b</sup> | <i>Adjusted relative risk from complete case analysis (95% CI)</i> <sup>b</sup> |
|--------------------------------------------|------------------------------------------------------------------------|---------------------------------------------------------------------------------|
| Allergic disease with sensitisation        | 0.70 (0.45 to 1.09)                                                    | 0.69 (0.44 to 1.07)                                                             |
| Allergic disease without sensitisation     | 1.10 (0.79 to 1.55)                                                    | 1.09 (0.77 to 1.54)                                                             |
| Sensitisation                              | 0.75 (0.53 to 1.04)                                                    | 0.75 (0.54 to 1.05)                                                             |
| Egg sensitisation                          | 0.62 (0.41 to 0.93)                                                    | 0.62 (0.41 to 0.93)                                                             |
| Peanut sensitisation                       | 0.63 (0.34 to 1.19)                                                    | 0.64 (0.34 to 1.20)                                                             |
| Sensitisation without allergic disease     | 0.83 (0.47 to 1.47)                                                    | 0.87 (0.49 to 1.55)                                                             |
| Eczema                                     | 0.91 (0.70 to 1.17)                                                    | 0.90 (0.70 to 1.17)                                                             |
| Eczema with sensitisation                  | 0.64 (0.40 to 1.03)                                                    | 0.63 (0.39 to 1.02)                                                             |
| Parent reported doctor diagnosis of eczema | 0.93 (0.74 to 1.18)                                                    | 0.93 (0.74 to 1.18)                                                             |
| Confirmed food allergy with sensitisation  | 0.96 (0.41 to 2.25)                                                    | 0.93 (0.39 to 2.18)                                                             |
| Suspected food allergy with sensitisation  | 0.69 (0.36 to 1.31)                                                    | 0.69 (0.36 to 1.31)                                                             |
| Confirmed egg allergy                      | 0.79 (0.27 to 2.30)                                                    | 0.78 (0.27 to 2.28)                                                             |
| Suspected egg allergy                      | 0.47 (0.21 to 1.02)                                                    | 0.46 (0.21 to 1.00)                                                             |
| Confirmed or suspected egg allergy         | 0.56 (0.30 to 1.04)                                                    | 0.55 (0.29 to 1.02)                                                             |

| <i>Outcome</i> <sup>a</sup>  | <i>Adjusted relative risk from imputed model (95% CI)</i> <sup>b</sup> | <i>Adjusted relative risk from complete case analysis (95% CI)</i> <sup>b</sup> |
|------------------------------|------------------------------------------------------------------------|---------------------------------------------------------------------------------|
| Antibiotics use              | 1.04 (0.91 to 1.18)                                                    | 1.05 (0.92 to 1.19)                                                             |
| Ear antibiotics use          | 1.10 (0.86 to 1.41)                                                    | 1.11 (0.87 to 1.42)                                                             |
| Respiratory tract infections | 0.91 (0.67 to 1.23)                                                    | 0.90 (0.66 to 1.23)                                                             |
| Admission to hospital        | 0.82 (0.61 to 1.11)                                                    | 0.83 (0.62 to 1.12)                                                             |
| Visited doctor               | 1.00 (0.95 to 1.04)                                                    | 0.99 (0.95 to 1.04)                                                             |

<sup>a</sup> *Results presented for only those binary outcomes that were imputed.*

<sup>b</sup> *Relative risk n-3 LCPUFA vs control adjusted for centre, parity, infant sex and maternal history of allergic disease.*

**Table A5: Comparison of imputed results with complete case analysis for continuous outcomes**

| <i>Outcome</i>                | <i>Adjusted mean difference from imputed model (95% CI)</i> <sup>b</sup> | <i>Adjusted mean difference from complete case analysis (95% CI)</i> <sup>b</sup> |
|-------------------------------|--------------------------------------------------------------------------|-----------------------------------------------------------------------------------|
| Objective SCORAD <sup>a</sup> | 0.21 (-0.03 to 0.44)                                                     | 0.21 (-0.03 to 0.45)                                                              |

<sup>a</sup> *Objective SCORAD scores were log transformed to better satisfy the assumptions of the linear regression model.*

<sup>b</sup> *Mean difference n-3 LCPUFA vs control adjusted for centre, parity, infant sex and maternal history of allergic disease.*

**Table A6: Comparison of imputed results with complete case analysis for count outcomes**

| <i>Outcome</i>             | <i>Adjusted ratio of means from imputed model (95% CI)</i> <sup>a</sup> | <i>Adjusted ratio of means from complete case analysis (95% CI)</i> <sup>a</sup> |
|----------------------------|-------------------------------------------------------------------------|----------------------------------------------------------------------------------|
| Number of hospitalisations | 0.73 (0.51 to 1.04)                                                     | 0.73 (0.51 to 1.05)                                                              |
| Number of doctor visits    | 1.06 (0.93 to 1.22)                                                     | 1.07 (0.93 to 1.22)                                                              |

<sup>a</sup> *Ratio of means n-3 LCPUFA vs control adjusted for centre, parity, infant sex and maternal history of allergic disease.*

## Web Appendix A reference list

Rubin D. *Multiple imputation for nonresponse in surveys*. New York: Wiley, 1987.
