# Supplementary material
Source: PubMed Central journal article supplement (PMC4789890)
Supplement: pald898288.ww2_default.pdf [file pald898288.ww2_default.pdf]

## Web Appendix B: Results for other secondary infant allergic disease outcomes

**Table B1: Infant allergic disease outcomes at one year - binary outcomes**

|                                                            | <i>n</i> -3 LCPUFA <sup>a</sup> | Control <sup>a</sup> | Unadjusted          | Unadjusted      | Adjusted <sup>b</sup> | Adjusted <sup>b</sup> |
|------------------------------------------------------------|---------------------------------|----------------------|---------------------|-----------------|-----------------------|-----------------------|
|                                                            | ( <i>n</i> =368)                | ( <i>n</i> =338)     | RR (95% CI)         | <i>P</i> -value | RR (95% CI)           | <i>P</i> -value       |
| Sensitisation without allergic disease                     | 22(5.89%)                       | 24(7.13%)            | 0.83 (0.46 to 1.47) | 0.51            | 0.83 (0.47 to 1.47)   | 0.52                  |
| Suspected food allergy with sensitisation                  | 16(4.21%)                       | 21(6.16%)            | 0.68 (0.36 to 1.31) | 0.25            | 0.69 (0.36 to 1.31)   | 0.25                  |
| Suspected egg allergy                                      | 9(2.45%)                        | 18(5.34%)            | 0.46 (0.21 to 1.01) | 0.052           | 0.47 (0.21 to 1.02)   | 0.06                  |
| Suspected or confirmed egg allergy                         | 15(4.08%)                       | 25(7.41%)            | 0.55 (0.29 to 1.02) | 0.06            | 0.56 (0.30 to 1.04)   | 0.07                  |
| Eczema                                                     | 89(24.25%)                      | 92(27.23%)           | 0.89 (0.69 to 1.15) | 0.37            | 0.90 (0.70 to 1.17)   | 0.45                  |
| Parent reported doctor diagnosis of eczema                 | 101(27.41%)                     | 100(29.68%)          | 0.92 (0.73 to 1.17) | 0.51            | 0.93 (0.74 to 1.18)   | 0.56                  |
| Frequent or persistent wheeze or asthma with sensitisation | 1(0.28%)                        | 0(0.0%)              |                     | >0.99           |                       |                       |
| Allergic rhinitis with sensitisation                       | 0(0.0%)                         | 1(0.31%)             |                     | 0.48            |                       |                       |

**Abbreviations:** CI, confidence interval; *n*-3 LCPUFA, long chain polyunsaturated fatty acid; RR, relative risk.

<sup>a</sup> All data are based on analysis of 50 imputed datasets. For *n*-3 LCPUFA and control groups data are number of subjects (percentage).

<sup>b</sup> Adjusted for centre, parity, maternal history and sex.

<sup>c</sup> Fisher exact test using original data, adjusted/imputed analyses not done due to rarity of outcomes.

**Table B2: Infant allergic disease outcomes at one year - Objective SCORAD score**

|                               | <i>n</i> -3 LCPUFA <sup>b</sup> | Control <sup>b</sup> | Unadjusted               | Unadjusted      | Adjusted <sup>c</sup>    | Adjusted <sup>c</sup> |
|-------------------------------|---------------------------------|----------------------|--------------------------|-----------------|--------------------------|-----------------------|
|                               | ( <i>n</i> =368)                | ( <i>n</i> =338)     | mean difference (95% CI) | <i>P</i> -value | mean difference (95% CI) | <i>P</i> -value       |
| Objective SCORAD <sup>a</sup> | 2.85(0.58)                      | 2.64(0.66)           | 0.20 (-0.03 to 0.44)     | 0.09            | 0.21 (-0.03 to 0.44)     | 0.09                  |

**Abbreviations: CI, confidence interval; n-3 LCPUFA, long chain polyunsaturated fatty acid.**

<sup>a</sup> **Objective SCORAD scores were log transformed to better satisfy the assumptions of the linear regression model.**

<sup>b</sup> **All data are based on analysis of 50 imputed datasets. For n-3 LCPUFA and control groups data are mean log Objective SCORAD score (standard deviation).**

<sup>c</sup> **Adjusted for centre, parity, maternal history and sex.**
